1 **Lifetime genealogical divergence within plants leads to epigenetic mosaicism**  
2 **in the long-lived shrub *Lavandula latifolia* (Lamiaceae)**

3

4 Carlos M. Herrera<sup>1,3</sup>, Pilar Bazaga<sup>1</sup>, Ricardo Pérez<sup>2</sup> and Conchita Alonso<sup>1</sup>

5

6 <sup>1</sup> *Estación Biológica de Doñana, Consejo Superior de Investigaciones Científicas (CSIC),*  
7 *Avda. Américo Vespucio 26, E-41092, Sevilla, Spain*

8 <sup>2</sup> *Instituto de Investigaciones Químicas, Centro de Investigaciones Científicas Isla de La*  
9 *Cartuja, CSIC-US, Avda. Américo Vespucio 49, E-41092, Sevilla, Spain*

10 <sup>3</sup> Author for correspondence: email [herrera@ebd.csic.es](mailto:herrera@ebd.csic.es), telephone +34 95 4466700

11

12 Word counts:

13 Introduction 913

14 Materials and Methods 1874

15 Results 815

16 Discussion 1628

17 Total 5230

18 5 figures (all in color)

19 3 tables

20 Supporting information: 3 figures and 2 tables

## 21 Summary

- 22 • Epigenetic mosaicism is a possible source of within-plant phenotypic heterogeneity, yet  
23 its frequency and developmental origin remain unexplored. This study examines whether  
24 the extant epigenetic heterogeneity within long-lived *Lavandula latifolia* (Lamiaceae)  
25 shrubs reflects recent epigenetic modifications experienced independently by different  
26 plant parts or, alternatively, it is the cumulative outcome of a steady lifetime process.
- 27 • Leaf samples from different architectural modules were collected from three *L. latifolia*  
28 plants and characterized epigenetically by global DNA cytosine methylation and  
29 methylation state of methylation-sensitive amplified fragment length polymorphism  
30 markers (MS-AFLP). Epigenetic characteristics of modules were then assembled with  
31 information on the branching history of plants. Methods borrowed from phylogenetic  
32 research were used to assess genealogical signal of extant epigenetic variation and  
33 reconstruct within-plant genealogical trajectory of epigenetic traits.
- 34 • Plants were epigenetically heterogeneous, as shown by differences among modules in  
35 global DNA methylation and variation in the methylation states of 6-8% of MS-AFLP  
36 markers. All epigenetic features exhibited significant genealogical signal within plants.  
37 Events of epigenetic divergence occurred throughout the lifespan of individuals and were  
38 subsequently propagated by branch divisions.
- 39 • Internal epigenetic diversification of *L. latifolia* individuals took place steadily during  
40 their development, a process which eventually led to persistent epigenetic mosaicism.

41 **Key words:** epigenetic mosaicism, DNA methylation, genealogical signal, high performance  
42 liquid chromatography, *Lavandula latifolia* (wild lavender), methylation-sensitive amplified  
43 fragment length polymorphism (AFLP), subindividual variation

44

## 45 Introduction

46 Within-plant variance in phenotypic traits of reiterated, homologous organs that perform the  
47 same function (leaves, flowers, fruits, seeds) is often very high, sometimes contributing more  
48 to total population-wide variance than differences among individuals (Herrera, 2009, 2017;  
49 Palacio *et al.*, 2019). Depending on its magnitude and spatio-temporal patterning, this  
50 subindividual phenotypic variance can have multiple ecological effects. These include  
51 optimizing the exploitation of limiting resources such as light, water or nitrogen (Osada *et*  
52 *al.*, 2014; Ponce-Bautista *et al.*, 2017; Mediavilla *et al.*, 2019), altering the outcome of

53 interactions with animals (Sobral *et al.*, 2013, 2014; Shimada *et al.*, 2015; Wetzzel *et al.*,  
54 2016), driving selection on reproductive traits (Austen *et al.*, 2015; Dai *et al.*, 2016; Arceo-  
55 Gómez *et al.*, 2017; Kulbaba *et al.*, 2017), and enhancing tolerance of environmental  
56 unpredictability (Tíscar Oliver & Lucas Borja, 2010; Hidalgo *et al.*, 2016). Because of these  
57 ecological effects, subindividual variability can eventually influence the fitness of  
58 individuals and become itself a target for natural selection, since plants not only have  
59 characteristic trait means but also characteristic trait variances and spatio-temporal patterns  
60 of subindividual heterogeneity (Herrera, 2009, 2017; Kulbaba *et al.*, 2017; Harder *et al.*,  
61 2019).

62 The evolutionary significance of within-plant heterogeneity in phenotypic traits of  
63 reiterated structures will depend on its causal mechanisms (Herrera, 2017). Position in  
64 relation to external environmental gradients (light, air temperature) or internal  
65 developmental axes (nodal position on branches) are factors ordinarily contributing to  
66 within-plant variation in phenotypic traits (Herrera, 2009). Subindividual polymorphisms in  
67 chromosome number (aneusomaty; D'Amato, 1997) or the DNA sequence of nuclear (Wang  
68 *et al.*, 2019; Orr *et al.*, 2020) and plastid genomes (García *et al.*, 2004; Sun *et al.*, 2019) can  
69 also account for subindividual phenotypic heterogeneity (Whitham *et al.*, 1984). The  
70 phenotypic effects of these polymorphisms, however, have been investigated on few  
71 occasions. Genetic heterogeneity caused by somatic mutations is unlikely to be a pervasive  
72 driver of within-plant heterogeneity in wild plants, given the paucity of well-documented  
73 genetic mosaics and the extremely low somatic mutation rates reported whenever such  
74 mosaics have been found (Padovan *et al.*, 2013; Ranade *et al.*, 2015; Schmid-Siegert *et al.*,  
75 2017; Gerber, 2018; Wang *et al.*, 2019; Orr *et al.*, 2020). Somatic mutations altering nuclear  
76 or plastid DNA sequences are not, however, the only molecular mechanism with a capacity  
77 to produce genomic heterogeneity and induce phenotypic variation within individual plants.  
78 Cytosine methylation is a major epigenetic mechanism in plants with roles in gene  
79 expression, transposon activity, and plant growth and development (Finnegan *et al.*, 2000;  
80 Cokus *et al.*, 2008; Lister *et al.*, 2008), hence subindividual heterogeneity in pattern and  
81 level of DNA methylation could also partly account for within-plant variation in organ traits  
82 (Herrera & Bazaga, 2013; Alonso *et al.*, 2018; Herrera *et al.*, 2019).

83 Epigenetic mosaics in which homologous organs in different parts of the same genetic  
84 individual differ in extent and/or patterns of DNA methylation have been documented for  
85 clonal and non-clonal plants (Bitonti *et al.*, 1996; Gao *et al.*, 2010; Bian *et al.*, 2013; Spens

86 & Douhovnikoff, 2016), and associations between phenotypic heterogeneity and  
87 subindividual epigenetic variation, either natural or experimentally induced, have been also  
88 found (Herrera & Bazaga, 2013; Alonso *et al.*, 2018; Herrera *et al.*, 2019). In adult  
89 *Lavandula latifolia* (Lamiaceae) plants there is substantial subindividual heterogeneity in  
90 global DNA cytosine methylation. Such variation is correlated with within-plant variation in  
91 the number and size of seeds produced (Alonso *et al.*, 2018), which supports a causal link  
92 between epigenetic mosaicism and subindividual phenotypic heterogeneity. In the perennial  
93 herb *Helleborus foetidus* (Ranunculaceae), artificial augmentation of within-plant  
94 heterogeneity in global DNA cytosine methylation enhanced within-plant variance in  
95 phenotypic traits, as predicted by the hypothesis that epigenetic mosaicism can contribute to  
96 within-plant variation (Herrera *et al.*, 2019).

97 Two different mechanisms could lead to within-plant epigenetic mosaics and  
98 associated phenotypic heterogeneity of the sort documented by Alonso *et al.* (2018) for *L.*  
99 *latifolia*. These mosaics could mostly reflect ephemeral epigenetic modifications  
100 experienced recently by different plant parts independently of each other or, alternatively,  
101 represent relatively stable somatic conditions reflecting past epigenetic changes which took  
102 place at different moments in the plant's ontogeny. Under this latter scenario, subindividual  
103 epigenetic heterogeneity at a given moment in a plant's lifetime should be genealogically  
104 structured, representing the signature of past localized changes within the plant that were  
105 propagated and maintained through successive divisions of terminal meristems. This  
106 mechanism for internal epigenetic divergence by propagation of stable epimutations is  
107 essentially identical to that proposed previously to account for stable subindividual genetic  
108 mosaicism via propagation of somatic mutations (Whitham & Slobodchikoff, 1981; Buss,  
109 1983a, b; Whitham *et al.*, 1984; Gill *et al.*, 1995; Schmid-Siegert *et al.*, 2017; Orr *et al.*,  
110 2020).

111 This study evaluates the hypothesis that extant epigenetic heterogeneity within old  
112 plants of the evergreen shrub *L. latifolia* is genealogically structured and can thus be  
113 considered the outcome of a lifetime process of cumulative epigenetic diversification taking  
114 place within plants. Leaf samples from many distinct modules from the same individual  
115 plant were characterized epigenetically by measuring global DNA cytosine methylation and  
116 assessing the methylation state of a large number of methylation-sensitive anonymous DNA  
117 markers. Analyses were accomplished for three wild plants. By combining these data with  
118 detailed information on the branching history of each plant, and then applying quantitative

119 analytical methods borrowed from phylogenetic research to assess genealogical signal and  
120 reconstruct changes in epigenetic traits, we aim to assess whether extant epigenetic  
121 heterogeneity among the modules of the same individual attests their past genealogical  
122 trajectories within the plant.

## 123 **Materials and methods**

### 124 Study species and field methods

125 *Lavandula latifolia* Med. is a dome-shaped, long-lived evergreen shrub inhabiting the  
126 undergrowth of mid-elevation woodlands in the eastern Iberian Peninsula. Branching is  
127 dichasial and generally conforms to Leeuwenberg's development model (Hallé *et al.*, 1978;  
128 Hallé, 1986). This branching pattern leads to crowns of adult plants being made up of  
129 morphological units consisting of distinct leaf clusters borne by short stems, many of which  
130 produce one terminal inflorescence in early summer (Alonso *et al.*, 2018: Fig. 1). Each of  
131 these clusters of even-aged leaves borne by short terminal branchlets will be hereafter  
132 termed a 'module' following Hallé's (1986) definition ('the leafy axis in which the entire  
133 sequence of aerial differentiation is carried out, from the initiation of the meristem that  
134 builds up the axis to the sexual differentiation of its apex'). Mean seed mass and total seed  
135 production vary widely among modules of the same plant (Herrera, 1991, 2000), and this  
136 variation was shown by Alonso *et al.* (2018) to be related to subindividual mosaicism in  
137 global DNA cytosine methylation. Further details on the natural history, reproductive  
138 biology and demography of *L. latifolia* can be found in Herrera (1991), Herrera & Jovani  
139 (2010), Herrera & Bazaga (2016), and references therein.

140 Field sampling for this study was conducted on September 2017 at a large *L. latifolia*  
141 population growing near Arroyo Aguaderillos in the Sierra de Cazorla (Jaén province,  
142 southeastern Spain). Three of the shrubs whose leaves and seeds had been previously  
143 sampled by Alonso *et al.* (2018; plants TSE03, TSE04 and TSE05) were harvested by  
144 digging up their roots and brought to the laboratory. Each plant was an individual arising  
145 from a single taproot. Fresh leaf samples were collected from as many modules as possible  
146 of each plant within a few hours of harvest, subject to the constraint that all leaves in the  
147 sampled module should be healthy and free of any visible damage. Samples were placed in  
148 paper envelopes, quickly dried at ambient temperature in containers with abundant silica gel,  
149 and stored dry at ambient temperature for subsequent DNA extraction. A total of 20, 38 and  
150 22 leaf samples were obtained from as many modules of plants TSE03, TSE04 and TSE05,  
151 respectively.

## 152 Laboratory methods

153 Harvested plants were 23 (TSE03), 29 (TSE04) and 27 (TSE05) years old at time of  
154 collection as determined by ring counting (Herrera, 1991). A detailed map of the branching  
155 architecture of each plant was drawn by hand, and tips of branchlets from which leaf samples  
156 had been collected, and all internal branching nodes leading to them, were tagged and  
157 numbered. The linear distances between successive branching nodes, and between the last  
158 branching nodes and tips, were measured along branches. The age of every branching node  
159 and terminal branchlet (module) was determined by ring counting.

160 Dried leaf material was homogenized to a fine powder using a Retsch MM 200 mill  
161 and total genomic DNA was extracted from approximately 35 mg of ground leaf material  
162 using the Bioline ISOLATE II Plant DNA Kit and the manufacturer protocol. Aliquots from  
163 the DNA extract of each module ( $N = 80$ ) were used for estimating genome-wide  
164 methylation of DNA cytosines and obtaining epigenetic fingerprints as detailed below.

165 Genome-wide percent cytosine methylation was determined for the leaves of each  
166 module using the chromatographic technique described by Alonso *et al.* (2016; see also  
167 Alonso *et al.*, 2018). Genomic DNA was digested with DNA Degradase Plus™ (Zymo  
168 Research, Irvine, CA), a nuclease mix that degrades DNA to its individual nucleoside  
169 components. Digested samples were stored at  $-20^{\circ}\text{C}$  until analyzed. Two independent  
170 technical replicates of DNA hydrolyzate were prepared for each module, and the 160  
171 samples (80 modules x 2 replicates) were processed in randomized order. DNA cytosine  
172 methylation was determined for each sample by reversed phase HPLC with  
173 spectrofluorimetric detection. Global cytosine methylation was estimated as  $100 \times$   
174  $5\text{mdC}/(5\text{mdC} + \text{dC})$ , where 5mdC and dC are the integrated areas under the peaks for 5-  
175 methyl-2'-deoxycytidine and 2'-deoxycytidine, respectively. The position of each nucleoside  
176 was determined using commercially available standards (Sigma Aldrich).

177 Variation among modules of the same plant in epigenetic fingerprint was investigated  
178 using a variant of the amplified fragment-length polymorphisms technique (AFLP) which  
179 allowed to identify instances of within-plant polymorphism in the methylation state of  
180 methylation-susceptible anonymous 5'-CCGG sequences. As we were interested in detecting  
181 heterogeneity in genomic DNA methylation profiles among modules from the same  
182 genotype, our AFLP method used exclusively primer combinations based on the  
183 methylation-sensitive HpaII enzyme. HpaII cleaves 5'-CCGG sequences but is inactive  
184 when either or both cytosines are fully methylated, and cleaving may be impaired or blocked



185 when one or both of the cytosines are hemi-methylated (McClelland *et al.*, 1994; Roberts *et*  
186 *al.*, 2007). In absence of DNA sequence variation among samples, as expected for leaves  
187 from the same plant, any within-plant polymorphism in these methylation-sensitive AFLP  
188 markers (MS-AFLP hereafter) will reflect subindividual heterogeneity in the methylation  
189 state of the associated 5'-CCGG site (see Verhoeven *et al.*, 2010; Herrera *et al.*, 2012,  
190 Herrera & Bazaga, 2013; for applications of this simplified AFLP method in epigenetic  
191 studies of plants and fungi). MS-AFLP analyses and fragment scoring were performed  
192 following the protocols described in Herrera & Bazaga (2013, 2016). Leaf samples were  
193 fingerprinted using eight primer combinations, each with two (HpaII) or three (MseI)  
194 selective nucleotides, which were chosen on the basis of repeatability and ease of scoring  
195 (Supporting Information Table S1). Scoring error rates were determined for each individual  
196 marker by running replicated analyses for 25 leaf samples (31.2% of total), and estimated as  
197 the ratio of the number of discordant scores in the two analyses to the total number of  
198 replicated samples. To minimize the possibility of spurious within-plant polymorphisms  
199 arising from scoring errors, only the  $N = 467$  markers with scoring error rates equal to zero  
200 were retained for the analyses (Supporting Information Table S1).

## 201 Data analysis

202 **Extant epigenetic heterogeneity** All statistical analyses reported in this paper were carried  
203 out using the R environment (R Core Team, 2020). Heterogeneity in global cytosine  
204 methylation among sampled plants, and among modules of the same plant, was tested by  
205 fitting a linear model to the data, treating plants and modules nested within plants as fixed-  
206 effect predictors. The contribution of differences between plants, and between modules  
207 within plants, to total sample variance in global cytosine methylation were estimated by  
208 fitting an intercept-only random effect model to the data using the lmer function of the lme4  
209 package (Bates *et al.*, 2015), with plants and modules as hierarchically nested random  
210 effects. Confidence intervals of variance estimates were computed using the function  
211 confint.merMod in lme4.

212 For each plant, a module x MS-AFLP marker binary matrix was obtained whose  
213 elements were the methylation state of each marker in the given module (1 = unmethylated;  
214 0 = methylated). In each matrix, only those markers occurring unmethylated in at least one  
215 module of the plant were retained for analysis ('informative markers' hereafter), because our  
216 MS-AFLP procedure did not allow to discriminate between homogeneous methylation and  
217 fragment absence for those markers which did not occur in any module of a plant. Another

218 binary matrix was obtained for all plants and modules combined using only those markers  
219 that were simultaneously informative in all plants ( $N = 400$ ). Multivariate analyses of within-  
220 and among-plant variation in epigenetic fingerprints were then conducted on these data,  
221 which included nonmetric multidimensional scaling (function metaMDS in package vegan;  
222 Oksanen *et al.*, 2019) and analysis of molecular variance (adonis function in vegan) on the  
223 pairwise matrix of Jaccard dissimilarity between modules.

224 **Within-plant genealogy of epigenetic heterogeneity** Two Newick-formatted genealogical  
225 trees were constructed for each plant by collating the topological information from drawings  
226 of branching architecture and the quantitative data on linear or temporal distances between  
227 branching nodes. In these genealogical trees the modules sampled were at the tips and  
228 branch lengths were either the linear distance between branching nodes or their age  
229 difference in years (Supporting Information Fig. S1). Although growth- and age-based  
230 branch lengths were correlated in the three plants ( $R^2 = 0.57$ - $0.61$ ), we used trees based on  
231 these two different metrics to explore whether epigenetic changes taking place over a plant's  
232 lifetime were best explained in terms of the amount of growth or the time elapsed between  
233 successive branching nodes.

234 The dichotomous branching trees used here to depict genealogical relationships among  
235 extant modules of *L. latifolia* plants are conceptually equivalent to the phylogenetic trees  
236 commonly used to depict the evolution of contemporary taxa by descent with modification.  
237 There is the advantageous difference that our genealogical trees are errorless pedigrees  
238 representing true relationships rather than uncertain inferential hypotheses as it usually  
239 happens with phylogenetic trees (Felsenstein, 2004). Methods borrowed from phylogenetic  
240 research were used to investigate the genealogical component of extant within-plant  
241 epigenetic mosaicism in *L. latifolia* shrubs (see Orr *et al.*, 2020, for a comparable approach).  
242 'Genealogical tree', 'genealogical character estimation' and 'genealogical signal' will be  
243 used hereafter as the within-plant equivalents to 'phylogenetic tree', 'ancestral character  
244 estimation' and 'phylogenetic signal', respectively (Paradis, 2012; Münkemüller *et al.*,  
245 2012). Assessment of genealogical signal and genealogical character estimation will be  
246 consistently used throughout this paper to evaluate the genealogical basis of extant  
247 epigenetic mosaicism within *L. latifolia* plants. The first approach provides a quantitative  
248 assessment at the whole plant level of the association between trait similarity and proximity  
249 in the genealogy, while the second will inform on the spatio-temporal patterns of epigenetic  
250 changes taking place within individual plants over their lifetimes.



251 For continuous traits (global DNA cytosine methylation and coordinates of modules on  
252 axes from nonmetric multidimensional scaling), genealogical character estimations were  
253 carried out with function `contMap` from the `phytools` package (Revell, 2012). Genealogical  
254 signal was tested with the `philoSignal` function in the `philosignal` package (Keck et al., 2016)  
255 and Moran's  $I$  method, which relies on an autocorrelation approach, makes no assumptions  
256 on model of change and incorporates information on branch length (Münkemüller *et al.*,  
257 2012). Within-plant genealogical signal in the methylation state of individual MS-AFLP  
258 markers (0 = methylated, 1 = unmethylated) was tested using Fritz & Purvis' (2010)  $D$   
259 statistic for binary traits, a measurement of character dispersion on the genealogy. In these  
260 analyses, only the most informative polymorphic markers (frequency of commonest  
261 methylation state  $< 0.85$ ) were considered for each plant ( $N = 3, 6$  and  $6$  markers for plants  
262 TSE03, TSE04 and TSE05, respectively). Computations were conducted with function  
263 `phylo.d` from the `caper` package (Orme *et al.*, 2018). Randomization tests were used to assess  
264 statistical significance of differences between observed  $D$  values and expectations from  
265 random ( $D = 1$ ) and Brownian motion ( $D = 0$ ) distributions of methylation state of individual  
266 markers across tips of genealogical trees (Fritz & Purvis, 2010). Transition rates between the  
267 methylated and unmethylated states of individual markers on plant genealogies were  
268 explored by fitting 'Equal rates' (ER) and 'All rates different' (ARD) discrete evolution  
269 models to genealogical trees using the `fitDiscrete` function in the `geiger` package (Pennell *et*  
270 *al.*, 2014). Akaike information criterion (AIC) for fitted ER and ARD models were  
271 compared with the `aic.w` function of the `phytools` package. The stochastic mapping  
272 procedure of Bollback (2006), as implemented in function `make.simmap` of the `phytools`  
273 package, was used for genealogical character estimation of the methylation state of markers  
274 with genealogical signal within plants.

## 275 **Results**

### 276 Extant epigenetic heterogeneity

277 There was substantial subindividual heterogeneity in global DNA cytosine methylation  
278 among the even-aged leaf samples from different modules. In addition to differences among  
279 plants ( $F_{2,92} = 12.18$ ,  $P = 0.00002$ ), cytosine methylation also differed among modules of the  
280 same plant ( $F_{77,92} = 1.59$ ,  $P = 0.017$ ). Estimated within-plant variance in global cytosine  
281 methylation (0.119; 95% confidence interval = 0.015–0.252) was roughly comparable to  
282 among-plant variance (0.100; 95% confidence interval = 0.0056–0.647), further stressing the  
283 quantitative importance of within-plant variation in the extent of genomic methylation.

284 Modules from the same plant were broadly scattered on the plane defined by axes from  
285 nonmetric multidimensional scaling of the pairwise dissimilarity matrix (Fig. 1), thus  
286 revealing substantial within-plant epigenetic heterogeneity in the multivariate space defined  
287 by those informative MS-AFLP markers which were shared by all plants ( $N = 400$ ). Analysis  
288 of molecular variance on the matrix of pairwise dissimilarities between modules revealed  
289 that 29.2% of total epigenetic variance in the sample was accounted for by differences  
290 among modules of the same plant.

291 Subindividual epigenetic heterogeneity was also apparent when informative MS-AFLP  
292 markers were considered individually. The three plants studied were closely similar with  
293 regard to the number of informative markers (range = 427-431 markers; Table 1). In every  
294 plant a small, but non-negligible fraction of these markers (range = 5.8-7.7%; Table 1) were  
295 polymorphic in methylation state among modules of the same plant, i.e., occurred in the  
296 methylated and unmethylated states in different parts of the same shrub. About one third of  
297 polymorphic informative markers occurred predominantly in the methylated state, and two  
298 thirds occurred predominantly in the unmethylated state (Table 1). About 20% of  
299 subindividually polymorphic loci ( $N = 75$ , all plants combined) were polymorphic in more  
300 than one plant (Supporting Information Fig. S2).

### 301 Within-plant genealogy of epigenetic heterogeneity

302 Within-plant heterogeneity in global DNA cytosine methylation had genealogical signatures  
303 in two plants (TSE04 and TSE05), as denoted by statistically significant or marginally  
304 significant Moran's  $I$  autocorrelations, irrespective of the branch length metric used to  
305 construct genealogical trees (Table 2). Genealogical character estimations revealed some  
306 nodes early in the plants' lives whose descendant branches were consistently characterized  
307 until the time of collection by divergent values of global cytosine methylation (marked by  
308 arrows in Fig. 2).

309 Heterogeneity among modules of the same plant in multilocus epigenetic fingerprints,  
310 as assessed by coordinates from nonmetric multidimensional scaling of pairwise distance  
311 matrices (MDS1 and MDS2), had statistically significant genealogical signals in plants  
312 TSE03 (axis MDS1) and TSE04 (axes MDS1 and MDS2), irrespective of branch length  
313 metric used to construct genealogical trees (Table 3). Genealogical character estimations for  
314 MDS1 and MDS2 revealed one or more branching nodes early in the lives of the plants  
315 studied whose descendant branches were subsequently characterized by divergent multilocus  
316 epigenetic fingerprints until the time of collection (nodes marked by arrows, Fig. 3).

317 Variation across modules of the same plant in the methylation state of the most  
318 polymorphic MS-AFLP markers was significantly related to module genealogy (Fritz-  
319 Purvis'  $D < 1$ ) in about two thirds of instances tested (15 markers x 2 branch length metric  
320 combinations) (Fig. 4; Supporting Information Table S2). One, five and three markers  
321 exhibited genealogical signal in plants TSR03, TSE04 and TSE05, respectively (Fig. 4). The  
322  $D$  statistic did not depart significantly from Brownian motion expectations ( $D = 0$ ) in any of  
323 these cases (Fig. 4). Genealogical character estimations of within-plant variation in  
324 methylation state for markers with genealogical signal are shown in Fig. 5 on trees whose  
325 branch lengths are age differences (results were closely similar for trees based on linear  
326 distances between nodes; Supporting Information Fig. S3). Genealogical clumping of marker  
327 methylation state at tree tips (modules) was evident in all cases, although the size of clumps  
328 and their time of divergence along the plant's lifetime ranged widely among markers. In  
329 some cases the initial divergence in methylation state occurred when plants were  $\leq 5$  yr old,  
330 and its subsequent propagation over many years of branching without methylation change  
331 eventually formed large genealogical clumps (e.g., TG\_CTA\_297, TC\_CCT\_367). In other  
332 cases, in contrast, the initial methylation divergence at the base of a clump occurred when  
333 plants were already  $\geq 15$  yr old, and the resulting genealogical clumps were smaller and  
334 involved fewer modules (TC\_CGC\_347, TC\_CCT\_200; Fig. 5). Some instances of recent  
335 reversals in methylation state were apparent within the genealogically oldest clumps (e.g.,  
336 TG\_CTA\_297, TC\_CCT\_367; Fig. 5).

337 Paired 'Equal rates' (ER) and 'All rates different' (ARD) discrete evolution models  
338 fitted to within-plant methylation state data for individual markers generally provided better  
339 support for the ER model (63.3% of instances; Supporting Information Table S2). When  
340 ARD models provided a better fit (36.7% of instances), mean ( $\pm$  SE) transition rate from the  
341 unmethylated to the methylated state ( $0.360 \pm 0.029$ ) was only slightly higher than the  
342 transition rate from the methylated to the unmethylated state ( $0.295 \pm 0.022$ ) (Supporting  
343 Information Table S2).

## 344 Discussion

### 345 Extant subindividual epigenetic heterogeneity and its origin

346 Plants of *L. latifolia* were epigenetically heterogeneous at time of collection. Leaves from  
347 different modules in the same plant differed in global DNA methylation and MS-AFLP  
348 profiles at multilocus and single-marker levels. These findings extend those of Alonso *et al.*  
349 (2018) for this species showing within-plant heterogeneity in global methylation for a

350 superset of the plants considered here. Global methylation may vary within species or  
351 individuals in relation to plant age or tissue of origin (Mankessi *et al.*, 2011; Vining *et al.*,  
352 2012; Alonso *et al.*, 2017; Gao *et al.*, 2019), but none of these factors can account for  
353 heterogeneous genomic methylation within plants of *L. latifolia* found here and by Alonso *et*  
354 *al.* (2018), since all DNA samples from the same plant were from even-aged leaf cohorts.  
355 The same applies to within-plant heterogeneity in epigenetic fingerprint and methylation  
356 state of MS-AFLP markers.

357 A demographic study on the study population revealed that mean longevity of *L.*  
358 *latifolia* individuals that flowered at least once during their lifetimes was 22 years, and only  
359 ~7% of these lived for >30 years (Herrera & Bazaga, 2016). Since plants included in this  
360 study were 23-29 yr old at time of collection, our results refer to the older age class in the  
361 population. Insofar as within-plant patterning of epigenetic features is a cumulative process  
362 taking place over a plant's lifetime, as suggested by this study, such patterning would  
363 possibly have been weaker or harder to detect in younger individuals. This is supported by  
364 variation among plants studied in frequency of significant genealogical signals of epigenetic  
365 features, which tended to increase from the youngest (TSE03) to the oldest (TSE04)  
366 individual. It should also be kept in mind that insufficient statistical power probably  
367 hindered detection of genealogical signal in the younger plants. With very small trees ( $N \sim$   
368 20 tips, as in TSE03 and TSE05), all methods for detecting genealogical signal have high  
369 Type II errors (Blomberg *et al.*, 2003; Münkemüller *et al.*, 2012). Larger genealogical trees  
370 from species with longer longevities (e.g., trees) should be most favorable for the detection  
371 of genealogical signal.

372 Trees used for assessing genealogical signal in extant epigenetic heterogeneity  
373 represent the developmental pedigree of modules at the tips, and describe the ontogenetic  
374 unfolding of each individual over its lifetime. All modules in a plant derive from the same  
375 ancestor, namely the initial seedling arising from a seed, and genealogical trees depict the  
376 topology of descendant lineages arising from branching events. Pairs of modules physically  
377 closer at tips of a tree are also historically and developmentally closer to their most recent  
378 common ancestor module than pairs of modules located farther away in the tree. These  
379 relationships, along with the regularly dichasial branching pattern that characterizes *L.*  
380 *latifolia* shrubs, justify our application of methods from phylogenetic research to assess  
381 genealogical signal and perform genealogical reconstructions of within-plant epigenetic  
382 changes (see also Orr *et al.*, 2020). These methods could be used for the same purpose on

383 other woody perennials that follow Leeuwenberg's model of architecture (see, e.g.,  
384 Hamilton, 1985; Hallé, 1986; Navarro *et al.*, 2009; for tropical and non-tropical examples).

385 Results of this study agree with expectations from the hypothesis advanced by Alonso  
386 *et al.* (2018) that subindividual variation in epigenetic features of *L. latifolia* plants was the  
387 consequence of the concerted action of plant sectoriality (plant body's compartmentalization  
388 into physiologically semi-autonomous subunits; Watson, 1986) and the differential action on  
389 plant parts of some factor(s) inducing persistent changes in extent and/or patterns of DNA  
390 cytosine methylation (e.g., pathogens, herbivores, insolation, UV light, water shortage,  
391 nitrogen deficiency; reviewed by Alonso *et al.*, 2016). Sectoriality will constrain the  
392 horizontal circulation of phloem-mobile molecules that regulate DNA methylation (McGarry  
393 & Kragler, 2013; Lewsey *et al.*, 2016), thus contributing to maintain within-plant  
394 heterogeneity in epigenetic features arising from random epimutations or localized responses  
395 to environmental agents, as previously suggested in relation to other subindividually variable  
396 traits (Orians & Jones, 2001; Herrera, 2009). We found here that extant within-plant  
397 heterogeneity in epigenetic features (global DNA cytosine methylation, MS-AFLP  
398 multivariate fingerprint, methylation state of specific MS-AFLP markers) exhibited  
399 statistically significant genealogical signals. Results were considerably robust irrespective of  
400 whether branch lengths of genealogical trees were linear or temporal distances between  
401 nodes. This points to an equivalence of ageing and growing as ultimate agents of within-  
402 plant epigenetic diversification over a plant's lifetime.

403 Genealogical character reconstructions revealed that early events of internal epigenetic  
404 divergence took place when plants were still very young (< 5 yr), before reaching the age of  
405 first reproduction (Herrera & Bazaga, 2016). In general, the timing of epigenetic  
406 modifications spanned the entire lifespan of individuals, thus revealing that epigenetic  
407 features experienced steady changes throughout individual plants' lives. This was  
408 particularly evident in the case of changes in methylation state of subindividually  
409 polymorphic MS-AFLP markers, where changes conforming to a Brownian motion model  
410 took place over the life of individuals with about similar estimated probabilities in both  
411 directions, and even the reversion to the 'ancestral' methylation state could be documented.  
412 A corollary of this finding is that *L. latifolia* individuals can produce slightly different  
413 epigenetic fingerprints over its lifetime if sampled repeatedly over a sufficiently broad  
414 timespan. This expectation is upheld by preliminary results for plants from our study  
415 population which were sampled on two occasions nine years apart (C. M. Herrera,

416 *unpublished data*).

417 Toward an epigenetic mosaicism hypothesis

418 Modular construction by continual organogenesis and reiterated production of homologous  
419 structures is a quintessential plant feature which has motivated the consideration of plant  
420 individuals as non-unitary metapopulations of semi-autonomous modules, a notion departing  
421 from the common zoocentric definition of organismic individuality (Gerber, 2018). This  
422 view led to the incorporation of selection at the subindividual level as a possible  
423 evolutionary mechanism (Buss, 1983a, b; Pineda-Krch & Poore, 2004), and provided the  
424 foundations for the ‘genetic mosaicism hypothesis’ (GMH) (Whitham & Slobodchikoff,  
425 1981; Whitham *et al.*, 1984; Gill *et al.*, 1995). The following premises synthesize the GMH  
426 (slightly modified from Gill *et al.*, 1995): (i) spontaneous mutations occur among the  
427 proliferating meristems; (ii) the meristematic and modular basis of plant development  
428 assures that many of these mutations are preserved and expanded hierarchically among  
429 modules as the plant grows; (iii) the differential growth and survival of ramets, branches and  
430 shoots should alter the genotypic configuration of the plant as it grows; and (iv) the within-  
431 plant phenotypic heterogeneity arising from genotypic heterogeneity will affect individual  
432 fitness through effects on the progeny, plant responses to the environment, or responses of  
433 animal consumers (Whitham & Slobodchikoff, 1981; Whitham *et al.*, 1984; Gill *et al.*, 1995;  
434 Herrera, 2009).

435 Studies focusing on subindividual genetic heterogeneity in wild plants have produced  
436 few good examples of genetic mosaicism in non-clonal woody plants, and generally  
437 documented very low somatic mutation rates (Cloutier *et al.*, 2003; Padovan *et al.*, 2013;  
438 Ranade *et al.*, 2015; Schmid-Siebert *et al.*, 2017; Wang *et al.*, 2019; Orr *et al.*, 2020; see also  
439 Herrera, 2009, for review). This tends to deny the evolutionary importance of genetic  
440 mosaicism advocated by the GMH (Pannell & Eppley, 2004; Gerber, 2018). In contrast, the  
441 few investigations that have so far addressed the possibility of subindividual variation in  
442 epigenetic features among homologous organs have found relatively high frequencies of  
443 somatic epigenetic variants, discernible within-plant epigenetic mosaicism, and/or  
444 relationships between subindividual epigenetic heterogeneity and within-plant phenotypic  
445 variation (Bitonti *et al.*, 1996; Herrera & Bazaga, 2013; Alonso *et al.*, 2018; Herrera *et al.*,  
446 2019; Hofmeister *et al.*, 2020). The present study has extended these previous findings by  
447 showing that steady epigenetic diversification over plants’ lifetimes can lie behind extant  
448 subindividual epigenetic mosaics.



449 Taken together, results obtained so far bearing on subindividual epigenetic variation  
450 motivate our proposal of an ‘epigenetic mosaicism hypothesis’ (EMH) consisting of exactly  
451 the same elements i-iv above as the original GMH but where the terms ‘mutation’, ‘genetic’  
452 and ‘genotype’ are replaced with ‘epimutation’, ‘epigenetic’ and ‘epigenotype’, respectively.  
453 Two additional components of GMH, namely inheritance of somatic mutations and impact  
454 of mosaicism on individual fitness, will often apply to EMH as well. Transgenerational  
455 epigenetic inheritance has been documented for model and non-model plants (Jablonka &  
456 Raz, 2009; Hauser *et al.*, 2011; Quadrana & Colot, 2016). In *L. latifolia* there is extensive  
457 transgenerational transmission of genome-wide global cytosine methylation levels and  
458 methylation state of anonymous epigenetic markers (Herrera *et al.*, 2018). Although the  
459 ecological impact has been rarely investigated, there is also evidence that within-plant  
460 epigenetic mosaicism can influence plant fitness (Alonso *et al.*, 2018; Herrera *et al.*, 2019).

461 By incorporating the within-plant realm to the already well-accepted consensus that  
462 epigenetic variation is an important source of phenotypic variance among individuals and  
463 populations (Bossdorf *et al.*, 2008, 2010; Lira-Medeiros *et al.*, 2010; Medrano *et al.*, 2014;  
464 Kooke *et al.*, 2015; Groot *et al.*, 2018), the EMH offers a particularly favorable arena for  
465 formulating and testing novel hypotheses on the ecological and evolutionary roles of  
466 epigenetic variation while holding constant the influence of genetic factors. For example,  
467 lifetime internal epigenetic diversification within individuals, as documented here for *L.*  
468 *latifolia*, may represent a mechanism of ‘exploration’ of the epigenetic landscape endowing  
469 each plant with a broader phenotypic space to cope with challenges of the abiotic and biotic  
470 environment. The breadth of such epigenetic sampling (i.e., within-individual  
471 epigenetic/phenotypic variance) should vary depending on life expectancy and species-  
472 specific patterns of meristem divisions related to the architectural model. Simple predictions  
473 from hypotheses framed around the EMH are amenable to experimentation by manipulating  
474 within-plant epigenetic heterogeneity while keeping genetic background constant, e.g., by  
475 localized application of chemical agents which alters methylation and monitoring effects on  
476 phenotypic heterogeneity and ecological consequences (Herrera *et al.*, 2019). These  
477 investigations are bound to contribute new insights on the mechanistic basis and ecological  
478 and evolutionary implications of the within-plant component of phenotypic variance in plant  
479 populations.

## 480 **Acknowledgements**

481 We are grateful to Esmeralda López Perea for laboratory assistance. Consejería de Medio

482 Ambiente, Junta de Andalucía, authorized this research and provided invaluable facilities at  
483 the study area. Partial support for this study was provided by grants CGL2016-76605-P  
484 (Ministerio de Economía y Competitividad, Spanish Government), PID2019-104365GB-I00  
485 (Ministerio de Ciencia e Innovación, Spanish Government), and P18-FR-4413 (Consejería  
486 de Transformación Económica, Industria, Conocimiento y Universidades, Andalusian  
487 Government).

#### 488 **Author contributions**

489 CMH designed the research, did field work, conducted data analyses, and led the writing;  
490 CA contributed data analyses and interpretations, and supervised laboratory work; RP and  
491 PB performed HPLC and MS-AFLP analyses, respectively; all authors reviewed and edited  
492 the manuscript.

#### 493 **ORCID**

494 Conchita Alonso <https://orcid.org/0000-0002-7418-3204>

495 Pilar Bazaga <https://orcid.org/0000-0001-7546-0990>

496 Carlos M. Herrera <https://orcid.org/0000-0003-2452-3888>

497 Ricardo Pérez <https://orcid.org/0000-0003-1733-8123>

#### 498 **References**

- 499 **Alonso C, Pérez R, Bazaga P, Medrano M, Herrera CM. 2016.** MSAP markers and  
500 global cytosine methylation in plants: a literature survey and comparative analysis for a  
501 wild growing species. *Molecular Ecology Resources* **16**: 80–90.
- 502 **Alonso C, Medrano M, Pérez P, Bazaga P, Herrera CM. 2017.** Tissue-specific response  
503 to experimental demethylation at seed germination in the non-model herb *Erodium*  
504 *cicutarium*. *Epigenomes* **1**: 16
- 505 **Alonso C, Pérez R, Bazaga P, Medrano M, Herrera CM. 2018.** Within-plant variation in  
506 seed size and inflorescence fecundity is associated with epigenetic mosaicism in the shrub  
507 *Lavandula latifolia* (Lamiaceae). *Annals of Botany* **121**: 153–160.
- 508 **Arceo-Gómez G, Vargas CF, Parra-Tabla V. 2017.** Selection on intra-individual variation  
509 in stigma-anther distance in the tropical tree *Ipomoea wolcottiana* (Convolvulaceae).  
510 *Plant Biology* **19**: 454–459.
- 511 **Austen EJ, Forrest JRK, Weis AE. 2015.** Within-plant variation in reproductive  
512 investment: consequences for selection on flowering time. *Journal of Evolutionary*  
513 *Biology* **28**: 65–79.
- 514 **Bates D, Maechler M, Bolker B, Walker S. 2015.** Fitting linear mixed-effects models

- 515 using lme4. *Journal of Statistical Software* **67**: 1–48.
- 516 **Bian RJ, Nie DD, Xing F, Zhou XL, Gao Y, Bai ZJ, Liu B. 2013.** Adaptational  
517 significance of variations in DNA methylation in clonal plant *Hierochloe glabra*  
518 (Poaceae) in heterogeneous habitats. *Australian Journal of Botany* **61**: 274–282.
- 519 **Bitonti MB, Cozza R, Wang G, Ruffini-Castiglione M, Mazzuca S, Castiglione S, Sala**  
520 **F, Innocenti AM. 1996.** Nuclear and genomic changes in floating and submerged buds  
521 and leaves of heterophyllous waterchestnut (*Trapa natans*). *Physiologia Plantarum* **97**:  
522 21–27.
- 523 **Blomberg SP, Garland T, Ives AR. 2003.** Testing for phylogenetic signal in comparative  
524 data: behavioral traits are more labile. *Evolution* **57**: 717–745.
- 525 **Bollback JP. 2006.** SIMMAP: Stochastic character mapping of discrete traits on  
526 phylogenies. *BMC Bioinformatics* **7**: 88.
- 527 **Bossdorf O, Richards CL, Pigliucci M. 2008.** Epigenetics for ecologists. *Ecology Letters*  
528 **11**: 106–115.
- 529 **Bossdorf O, Arcuri D, Richards CL, Pigliucci M. 2010.** Experimental alteration of DNA  
530 methylation affects the phenotypic plasticity of ecologically relevant traits in *Arabidopsis*  
531 *thaliana*. *Evolutionary Ecology* **24**: 541–553.
- 532 **Buss LW. 1983a.** Evolution, development, and the units of selection. *Proceedings of the*  
533 *National Academy of Sciences USA* **80**: 1387–1391.
- 534 **Buss LW. 1983b.** Somatic variation and evolution. *Paleobiology* **9**: 12–16.
- 535 **Cloutier D, Rioux D, Beaulieu J, Schoen DJ. 2003.** Somatic stability of microsatellite loci  
536 in Eastern white pine, *Pinus strobus* L. *Heredity* **90**: 247–252.
- 537 **Cokus SJ, Feng SH, Zhang XY, Chen ZG, Merriman B, Haudenschild CD, Pradhan S,**  
538 **Nelson SF, Pellegrini M, Jacobsen SE. 2008.** Shotgun bisulphite sequencing of the  
539 *Arabidopsis* genome reveals DNA methylation patterning. *Nature* **452**: 215–219.
- 540 **D'Amato F. 1997.** Role of somatic mutations in the evolution of higher plants. *Caryologia*  
541 **50**: 1–15.
- 542 **Dai C, Liang XJ, Ren J, Liao ML, Li JY, Galloway LF. 2016.** The mean and variability  
543 of a floral trait have opposing effects on fitness traits. *Annals of Botany* **117**: 421–429.
- 544 **Felsenstein J. 2004.** *Inferring phylogenies*. Sunderland, MA, USA: Sinauer.
- 545 **Finnegan EJ, Peacock WJ, Dennis ES. 2000.** DNA methylation, a key regulator of plant  
546 development and other processes. *Current Opinion in Genetics & Development* **10**: 217–  
547 223.

- 548 **Fritz SA, Purvis A. 2010.** Selectivity in mammalian extinction risk and threat types: a new  
549 measure of phylogenetic signal strength in binary traits. *Conservation Biology* **24**: 1042–  
550 1051.
- 551 **Gao LX, Geng YP, Li B, Chen JK, Yang J. 2010.** Genome-wide DNA methylation  
552 alterations of *Alternanthera philoxeroides* in natural and manipulated habitats:  
553 implications for epigenetic regulation of rapid responses to environmental fluctuation and  
554 phenotypic variation. *Plant Cell and Environment* **33**: 1820–1827.
- 555 **Gao Y, Hao J-L, Wang Z, Song K-J, Ye J-H, Zheng X-Q, Liang Y-R, Lu J-L. 2019.**  
556 DNA methylation levels in different tissues in tea plant via an optimized HPLC method.  
557 *Horticulture, Environment, and Biotechnology* **60**: 967–974.
- 558 **García MA, Nicholson EH, Nickrent DL. 2004.** Extensive intraindividual variation in  
559 plastid rDNA sequences from the holoparasite *Cynomorium coccineum* (Cynomoriaceae).  
560 *Journal of Molecular Evolution* **58**: 322–332.
- 561 **Gerber S. 2018.** An herbiary of plant individuality. *Philosophy, Theory, and Practice in*  
562 *Biology* **10**: 5.
- 563 **Gill DE, Chao L, Perkins SL, Wolf JB. 1995.** Genetic mosaicism in plants and clonal  
564 animals. *Annual Review of Ecology and Systematics* **26**: 423–444.
- 565 **Groot MP, Wagemaker N, Ouborg NJ, Verhoeven KJF, Vergeer P. 2018.** Epigenetic  
566 population differentiation in field- and common garden-grown *Scabiosa columbaria*  
567 plants. *Ecology and Evolution* **8**: 3505–3517.
- 568 **Hallé F. 1986.** Modular growth in seed plants. *Philosophical Transactions of the Royal*  
569 *Society B: Biological Sciences* **313**: 77–87.
- 570 **Hallé F, Oldeman RAA, Tomlinson PB. 1978.** *Tropical trees and forests. An architectural*  
571 *analysis*. Berlin: Springer.
- 572 **Hamilton CW. 1985.** Architecture in neotropical *Psychotria* L.(Rubiaceae): dynamics of  
573 branching and its taxonomic significance. *American Journal of Botany* **72**: 1081–1088.
- 574 **Harder LD, Strelin MM, Clocher IC, Kulbaba MW, Aizen MA. 2019.** The dynamic  
575 mosaic phenotypes of flowering plants. *New Phytologist* **224**: 1021–1034.
- 576 **Hauser MT, Aufsatz W, Jonak C, Luschnig C. 2011.** Transgenerational epigenetic  
577 inheritance in plants. *Biochimica et Biophysica Acta* **1809**: 459–468.
- 578 **Herrera CM. 1991.** Dissecting factors responsible for individual variation in plant  
579 fecundity. *Ecology* **72**: 1436–1448.
- 580 **Herrera CM. 2000.** Individual differences in progeny viability in *Lavandula latifolia*: a

- 581 long-term field study. *Ecology* **81**: 3036–3047.
- 582 **Herrera CM. 2009.** *Multiplicity in unity. Plant subindividual variation and interactions*  
583 *with animals*. Chicago, IL, USA: University of Chicago Press.
- 584 **Herrera CM. 2017.** The ecology of subindividual variability in plants: patterns, processes  
585 and prospects. *Web Ecology* **17**: 51–64.
- 586 **Herrera CM, Jovani R. 2010.** Log-normal distribution of individual lifetime fecundity:  
587 insights from a 23-yr study. *Ecology* **91**: 422–430.
- 588 **Herrera CM, Pozo MI, Bazaga P. 2012.** Jack of all nectars, master of most: DNA  
589 methylation and the epigenetic basis of niche width in a flower-living yeast. *Molecular*  
590 *Ecology* **21**: 2602-2616
- 591 **Herrera CM, Bazaga P. 2013.** Epigenetic correlates of plant phenotypic plasticity: DNA  
592 methylation differs between prickly and nonprickly leaves in heterophyllous *Ilex*  
593 *aquifolium* (Aquifoliaceae) trees. *Botanical Journal of the Linnean Society* **171**: 441–452.
- 594 **Herrera CM, Medrano M, Bazaga P. 2013.** Epigenetic differentiation persists after male  
595 gametogenesis in natural populations of the perennial herb *Helleborus foetidus*  
596 (Ranunculaceae). *PLoS One* **8**: e70730.
- 597 **Herrera CM, Bazaga P. 2016.** Genetic and epigenetic divergence between disturbed and  
598 undisturbed subpopulations of a Mediterranean shrub: a 20-year field experiment.  
599 *Ecology and Evolution* **6**: 3832–3847.
- 600 **Herrera CM, Alonso C, Medrano M, Pérez R, Bazaga P. 2018.** Transgenerational  
601 epigenetics: inheritance of global cytosine methylation and methylation-related epigenetic  
602 markers in the shrub *Lavandula latifolia*. *American Journal of Botany* **105**: 741–748.
- 603 **Herrera CM, Medrano M, Pérez R, Bazaga P, Alonso C. 2019.** Within-plant  
604 heterogeneity in fecundity and herbivory induced by localized DNA hypomethylation in  
605 the perennial herb *Helleborus foetidus*. *American Journal of Botany* **106**: 798–806.
- 606 **Hidalgo J, Rubio de Casas R, Muñoz MA. 2016.** Environmental unpredictability and  
607 inbreeding depression select for mixed dispersal syndromes. *BMC Evolutionary Biology*  
608 **16**: 71.
- 609 **Hofmeister BT, Denkena J, Colomé-Tatché M, Shahryary Y, Hazarika R, Grimwood J,**  
610 **Mamidi S, Jenkins J, Grabowski PP, Sreedasyam A, et al. 2020.** A genome assembly  
611 and the somatic genetic and epigenetic mutation rate in a wild long-lived perennial  
612 *Populus trichocarpa*. *Genome Biology* **21**: 259.
- 613 **Jablonka E, Raz G. 2009.** Transgenerational epigenetic inheritance: prevalence,

- 614 mechanisms, and implications for the study of heredity and evolution. *Quarterly Review*  
615 *of Biology* **84**: 131–176.
- 616 **Keck F, Rimet F, Bouchez A, Franc A. 2016.** phylosignal: an R package to measure, test,  
617 and explore the phylogenetic signal. *Ecology and Evolution* **6**: 2774–2780.
- 618 **Kooke R, Johannes F, Wardenaar R, Becker F, Etcheverry M, Colot V, Vreugdenhil D,**  
619 **Keurentjes JJB. 2015.** Epigenetic basis of morphological variation and phenotypic  
620 plasticity in *Arabidopsis thaliana*. *Plant Cell* **27**: 337–348.
- 621 **Kulbaba MW, Clocher IC, Harder LD. 2017.** Inflorescence characteristics as function-  
622 valued traits: analysis of heritability and selection on architectural effects. *Journal of*  
623 *Systematics and Evolution* **55**: 559–565.
- 624 **Lewsey MG, Hardcastle TJ, Melnyk CW, Molnar A, Valli A, Urich MA, Nery JR,**  
625 **Baulcombe DC, Ecker JR. 2016.** Mobile small RNAs regulate genome-wide DNA  
626 methylation. *Proceedings of the National Academy of Sciences USA* **113**: E801–E810.
- 627 **Lira-Medeiros CF, Parisod C, Fernandes RA, Mata CS, Cardoso MA, Ferreira PCG.**  
628 **2010.** Epigenetic variation in mangrove plants occurring in contrasting natural  
629 environment. *PLoS One* **5**: e10326.
- 630 **Lister R, O'Malley RC, Tonti-Filippini J, Gregory BD, Berry CC, Millar AH, Ecker**  
631 **JR. 2008.** Highly integrated single-base resolution maps of the epigenome in  
632 *Arabidopsis*. *Cell* **133**: 523–536.
- 633 **Mankessi F, Saya AR, Favreau B, Doulebeau S, Conejero G, Lartaud M, Verdeil JL,**  
634 **Monteuuis O. 2011.** Variations of DNA methylation in *Eucalyptus urophylla* x  
635 *Eucalyptus grandis* shoot tips and apical meristems of different physiological ages.  
636 *Physiologia Plantarum* **143**: 178–187.
- 637 **McClelland M, Nelson M, Raschke E. 1994.** Effect of site-specific modification on  
638 restriction endonucleases and DNA modification methyltransferases. *Nucleic Acids*  
639 *Research* **22**: 3640–3659.
- 640 **McGarry RC, Kragler F. 2013.** Phloem-mobile signals affecting flowers: applications for  
641 crop breeding. *Trends in Plant Science* **18**: 198–206.
- 642 **Mediavilla S, Martín I, Babiano J, Escudero A. 2019.** Foliar plasticity related to gradients  
643 of heat and drought stress across crown orientations in three Mediterranean *Quercus*  
644 species. *PLoS One* **14**: e0224462.
- 645 **Medrano M, Herrera CM, Bazaga P. 2014.** Epigenetic variation predicts regional and  
646 local intraspecific functional diversity in a perennial herb. *Molecular Ecology* **23**: 4926–



- 647 4938.
- 648 **Münkemüller T, Lavergne S, Bzeznik B, Dray S, Jombart T, Schiffrers K, Thuiller W.**  
649 **2012.** How to measure and test phylogenetic signal. *Methods in Ecology and Evolution* **3**:  
650 743–756.
- 651 **Navarro T, Pascual V, Cabezudo B, Alados CL. 2009.** Architecture and functional traits  
652 of semi-arid shrub species in Cabo de Gata Natural Park, SE Spain. *Candollea* **64**: 69–84.
- 653 **Oksanen J, Blanchet FG, Friendly M, Kindt R, Legendre P, McGlenn D, Minchin PR,**  
654 **O'Hara RB, Simpson GL, Solymos P, Stevens MHH, Szoecs E, Wagner H. 2019.**  
655 **vegan: Community ecology package.** R package version 2.5-4. [https://CRAN.R-](https://CRAN.R-project.org/package=vegan)  
656 [project.org/package=vegan](https://CRAN.R-project.org/package=vegan)
- 657 **Orians CM, Jones CG. 2001.** Plants as resource mosaics: a functional model for predicting  
658 patterns of within-plant resource heterogeneity to consumers based on vascular  
659 architecture and local environmental variability. *Oikos* **94**: 493–504.
- 660 **Orme D, Freckleton R, Thomas G, Petzoldt T, Fritz S, Isaac N, Pearse W. 2018.** caper:  
661 Comparative analyses of phylogenetics and evolution in R. R package version 1.0.1.  
662 <https://CRAN.R-project.org/package=caper>
- 663 **Orr AJ, Padovan A, Kainer D, Kulheim C, Bromham L, Bustos-Segura C, Foley W,**  
664 **Haff T, Hsieh JF, Morales-Suarez A, et al. 2020.** A phylogenomic approach reveals a  
665 low somatic mutation rate in a long-lived plant. *Proceedings of the Royal Society B:*  
666 *Biological Sciences* **287**: 20192364.
- 667 **Osada N, Yasumura Y, Ishida A. 2014.** Leaf nitrogen distribution in relation to crown  
668 architecture in the tall canopy species, *Fagus crenata*. *Oecologia* **175**: 1093–1106.
- 669 **Padovan A, Keszei A, Foley WJ, Külheim C. 2013.** Differences in gene expression within  
670 a striking phenotypic mosaic *Eucalyptus* tree that varies in susceptibility to herbivory.  
671 *BMC Plant Biology* **13**: 29.
- 672 **Palacio FX, Fernández GJ, Ordano M. 2019.** Does accounting for within-individual trait  
673 variation matter for measuring functional diversity? *Ecological Indicators* **102**: 43–50.
- 674 **Pannell JR, Eppley SM. 2004.** Intraorganismal genetic heterogeneity: is it a useful concept?  
675 *Journal of Evolutionary Biology* **17**: 1180–1181.
- 676 **Paradis E. 2012.** *Analysis of phylogenetics and evolution with R, 2nd edn.* New York, NY,  
677 USA: Springer.
- 678 **Pennell MW, Eastman JM, Slater GJ, Brown JW, Uyeda JC, FitzJohn RG, Alfaro ME,**  
679 **Harmon LJ. 2014.** geiger v2.0: An expanded suite of methods for fitting

- 680 macroevolutionary models to phylogenetic trees. *Bioinformatics* **30**: 2216–2218.
- 681 **Pineda-Krch M, Poore AGB. 2004.** Spatial interactions within modular organisms: genetic  
682 heterogeneity and organism fitness. *Theoretical Population Biology* **66**: 25–36.
- 683 **Ponce-Bautista A, Valverde PL, Flores J, Zavala-Hurtado A, Vite F, López-Ortega G,**  
684 **Pérez-Hernández MA. 2017.** Photosynthetically active radiation and carbon gain  
685 drives the southern orientation of *Myrtillocactus geometrizans* fruits. *Plant Biology* **19**:  
686 279–285.
- 687 **Quadrana L, Colot V. 2016.** Plant transgenerational epigenetics. *Annual Review of*  
688 *Genetics* **50**: 467–491.
- 689 **R Core Team. 2020.** *R: A language and environment for statistical computing*. Vienna,  
690 Austria: R Foundation for Statistical Computing.
- 691 **Ranade SS, Ganea LS, Razzak AM, Gil MRG. 2015.** Fungal infection increases the rate of  
692 somatic mutation in Scots Pine (*Pinus sylvestris* L.). *Journal of Heredity* **106**: 386–394.
- 693 **Revell LJ. 2012.** phytools: an R package for phylogenetic comparative biology (and other  
694 things). *Methods in Ecology and Evolution* **3**: 217–223.
- 695 **Roberts RJ, Vincze T, Posfai J, Macelis D. 2007.** REBASE – Enzymes and genes for  
696 DNA restriction and modification. *Nucleic Acids Research* **35**: D269–D270.
- 697 **Schmid-Siegert E, Sarkar N, Iseli C, Calderon S, Gouhier-Darimont C, Chrast J,**  
698 **Cattaneo P, Schütz F, Farinelli L, Pagni M. 2017.** Low number of fixed somatic  
699 mutations in a long-lived oak tree. *Nature Plants* **3**: 926.
- 700 **Shimada T, Takahashi A, Shibata M, Yagihashi T. 2015.** Effects of within-plant  
701 variability in seed weight and tannin content on foraging behaviour of seed consumers.  
702 *Functional Ecology* **29**: 1513–1521.
- 703 **Sobral M, Guitián J, Guitián P, Larrinaga AR. 2013.** Selective pressure along a  
704 latitudinal gradient affects subindividual variation in plants. *PLoS One* **8**: e74356.
- 705 **Sobral M, Guitián J, Guitián P, Larrinaga AR. 2014.** Seed predators exert selection on  
706 the subindividual variation of seed size. *Plant Biology* **16**: 836–842.
- 707 **Spens AE, Douhovnikoff V. 2016.** Epigenetic variation within *Phragmites australis* among  
708 lineages, genotypes, and ramets. *Biological Invasions* **18**: 2457–2462.
- 709 **Sun S-S, Zhou X-J, Li Z-Z, Song H-Y, Long Z-C, Fu P-C. 2019.** Intra-individual  
710 heteroplasmy in the *Gentiana tongolensis* plastid genome (Gentianaceae). *PeerJ* **7**:  
711 e8025.
- 712 **Tíscar Oliver PA, Lucas Borja ME. 2010.** Seed mass variation, germination time and

713 seedling performance in a population of *Pinus nigra* subsp. *salzamannii*. *Forest Systems*  
714 **19**: 344–353.

715 **Verhoeven KJF, Jansen JJ, van Dijk PJ, Biere A. 2010.** Stress-induced DNA methylation  
716 changes and their heritability in asexual dandelions. *New Phytologist* **185**: 1108–1118.

717 **Vining KJ, Pomraning KR, Wilhelm LJ, Priest HD, Pellegrini M, Mockler TC, Freitag**  
718 **M, Strauss SH. 2012.** Dynamic DNA cytosine methylation in the *Populus trichocarpa*  
719 genome: tissue-level variation and relationship to gene expression. *BMC Genomics* **13**:  
720 27.

721 **Wang L, Ji Y, Hu Y, Hu H, Jia X, Jiang M, Zhang X, Zhao L, Zhang Y, Jia Y, et al.**  
722 **2019.** The architecture of intra-organism mutation rate variation in plants. *PLoS Biology*  
723 **17**: e3000191.

724 **Watson MA. 1986.** Integrated physiological units in plants. *Trends in Ecology and*  
725 *Evolution* **1**: 119–123.

726 **Wetzel WC, Kharouba HM, Robinson M, Holyoak M, Karban R. 2016.** Variability in  
727 plant nutrients reduces insect herbivore performance. *Nature* **539**: 425–427.

728 **White J. 1979.** The plant as a metapopulation. *Annual Review of Ecology and Systematics*  
729 **10**: 109–145.

730 **Whitham TG, Slobodchikoff CN. 1981.** Evolution by individuals, plant-herbivore  
731 interactions, and mosaics of genetic variability: the adaptive significance of somatic  
732 mutations in plants. *Oecologia* **49**: 287–292.

733 **Whitham TG, Williams AG, Robinson AM 1984.** The variation principle: individual  
734 plants as temporal and spatial mosaics of resistance to rapidly evolving pests. In: Price  
735 PW, Slobodchikoff CN, Gaud WS eds. *A new ecology: novel approaches to interactive*  
736 *systems*: John Wiley & Sons, 15-51.

### 737 **Supporting Information**

738 Additional Supporting Information may be found online in the Supporting Information  
739 section at the end of the article.

740 **Fig. S1** Tree representations of genealogical relationships among the modules sampled in  
741 each of the three *Lavandula latifolia* individuals studied.

742 **Fig S2** Venn diagrams showing the distribution among plants of subindividually  
743 polymorphic methylation-sensitive AFLP markers.

744 **Fig. S3** Within-plant genealogical character estimation of the methylation state of  
745 polymorphic MS-AFLP markers on trees whose branch lengths are linear distances between  
746 nodes.

747 **Table S1** Primer combinations and number of fragments that were used in the MS-AFLP  
748 analyses of leaf DNA samples.

749 **Table S2** Summary of tests of within-plant genealogical signal, and fits of discrete character  
750 models, for highly polymorphic individual MS-AFLP markers.

751 **Table 1** Variation among modules of the same plant in methylation state of MS-AFLP  
752 markers. See supporting Information Fig. S2 for distribution among plants of shared and  
753 unique polymorphic markers.

| Plant | Modules<br>sampled | Informative<br>markers* | Subindividually polymorphic markers |                    |              |
|-------|--------------------|-------------------------|-------------------------------------|--------------------|--------------|
|       |                    |                         | Total                               | Predominant state: |              |
|       |                    |                         |                                     | Methylated         | Unmethylated |
| TSE03 | 20                 | 431                     | 33                                  | 11                 | 22           |
| TSE04 | 38                 | 427                     | 33                                  | 9                  | 24           |
| TSE05 | 22                 | 427                     | 25                                  | 8                  | 17           |

754 \* Out of a total of the  $N = 467$  markers considered whose estimated scoring error rates were  
755 equal to zero. Individual markers were considered informative for a given plant if they were  
756 recorded in at least one of its modules (see Materials and Methods: Data analysis).

757 **Table 2** Tests of genealogical signal for among-module variation in global DNA cytosine  
758 methylation within the three *Lavandula latifolia* plants studied.

| Plant | Branch length metric of genealogical tree |                   |                  |                   |
|-------|-------------------------------------------|-------------------|------------------|-------------------|
|       | Linear distance                           |                   | Age difference   |                   |
|       | Moran's <i>I</i>                          | <i>P</i> -value * | Moran's <i>I</i> | <i>P</i> -value * |
| TSE03 | -0.0498                                   | 0.45              | -0.0518          | 0.46              |
| TSE04 | 0.0210                                    | 0.046             | 0.0248           | 0.048             |
| TSE05 | 0.0199                                    | 0.067             | 0.0836           | 0.015             |

759 \* Determined by permutation tests with  $10^5$  repetitions.



760 **Table 3** Tests of genealogical signal for among-module variation in multilocus epigenetic  
761 fingerprints, assessed by coordinates from nonmetric multidimensional scaling (Fig. 1).

| Plant | Coordinate | Branch length metric of genealogical tree |                   |                  |                   |
|-------|------------|-------------------------------------------|-------------------|------------------|-------------------|
|       |            | Linear distance                           |                   | Age difference   |                   |
|       |            | Moran's <i>I</i>                          | <i>P</i> -value * | Moran's <i>I</i> | <i>P</i> -value * |
| TSE03 | MDS1       | -0.0529                                   | 0.46              | -0.0610          | 0.53              |
|       | MDS2       | 0.0437                                    | 0.0074            | 0.0440           | 0.010             |
| TSE04 | MDS1       | 0.0513                                    | 0.0055            | 0.0673           | 0.0039            |
|       | MDS2       | 0.1452                                    | <10 <sup>-5</sup> | 0.2070           | <10 <sup>-5</sup> |
| TSE05 | MDS1       | -0.0576                                   | 0.56              | -0.0449          | 0.43              |
|       | MDS2       | -0.0894                                   | 0.86              | -0.0871          | 0.79              |

762 \* Determined by permutation tests with 10<sup>5</sup> repetitions.

763 **Legends to figures**

764 **Fig. 1** Scatterplot of the  $N = 80$  modules (dots) sampled from three *Lavandula latifolia*  
765 plants (TSE03, TSE04, TSE05) on the plane defined by nonmetric multidimensional scaling  
766 of the matrix of pairwise epigenetic distances (MDS1 and MDS2; coordinates scaled to  
767 standard deviation unit and centered to the mean). Epigenetic distances between modules  
768 were obtained from the binary matrix of methylation states for the  $N = 400$  informative MS-  
769 AFLP loci shared by all plants. Ellipses denote the 95% bivariate confidence intervals  
770 around individual plant means. A small amount of random variation was added to the  
771 location of each point to reveal modules with identical coordinates.

772 **Fig. 2** Genealogical character estimation of within-plant changes in global DNA cytosine  
773 methylation for the three *Lavandula latifolia* plants studied (TSE03, TSE04, TSE05). Two  
774 genealogical trees were used for each plant, whose branch lengths were either linear  
775 distances (left column) or age differences (right column) between nodes (Supporting  
776 Information Fig. S1). Estimated changes in trait value along branches are color-mapped on  
777 each tree according to the scales shown. Limits of color scales differ slightly among plants  
778 because they were adjusted in each case to the corresponding minimum and maximum  
779 values. The arrows mark branching nodes referred to in the text.

780 **Fig. 3** Genealogical character estimation within individual *Lavandula latifolia* plants of  
781 changes in multilocus epigenetic fingerprints of individual modules, as described by their  
782 coordinates on the axes obtained from nonmetric multidimensional scaling of pairwise  
783 distance matrices (MDS1 and MDS2). Two trees were used for each plant, whose branch  
784 lengths were either linear distances (two left columns) or age differences (two right columns)  
785 between nodes. Estimated changes in trait value along branches are color-mapped on each  
786 tree. In each tree, the color scale was defined by the minimum (white) and maximum (red)  
787 values for the corresponding plant and axis (see Fig. 1). Scales have been omitted to reduce  
788 cluttering. The arrows mark branching nodes referred to in the text.

789 **Fig. 4** Summary of analyses of within-plant genealogical signal (Fritz-Purvis'  $D$  statistic) in  
790 the methylation state of highly polymorphic MS-AFLP markers (frequency of commonest  
791 methylation state  $< 0.85$ ;  $N = 3, 6$  and  $6$  markers for plants TSE03, TSE04 and TSE05,  
792 respectively). Blue and red dashed lines mark expected values from random and Brownian  
793 motion distributions of methylation state across tips of genealogical trees. Filled dots denote  
794 markers whose methylation state simultaneously exhibited significant genealogical clumping

795 within plants ( $D$  significantly  $< 1$ ) and nonsignificant departure from Brownian motion  
796 expectation ( $D = 0$ ). See Supporting Information Table S2 for detailed numerical results.  
797 **Fig. 5** Within-plant genealogical character estimation of the methylation state of nine highly  
798 polymorphic MS-AFLP markers with significant genealogical signal (Fig. 4, and Supporting  
799 Information Table S2). For each marker, methylation state in the sampled modules (tree tips)  
800 and estimated posterior probabilities at nodes are coded as grey (methylated) or orange  
801 (unmethylated). Tree branch lengths represent differences in age between nodes and units of  
802 horizontal axes are years. Markers are identified by primer combination and fragment size in  
803 base pairs (Supporting Information Table S1), and correspond to plants TSE03  
804 (TG\_CTA\_297), TSE04 (TT\_CAC\_413, TA\_CTA\_278, TC\_CGC\_347, TA\_CAC\_251,  
805 TC\_CCT\_367) and TSE05 (TC\_CGC\_241, TC\_CCT\_200, TC\_CCT\_390).

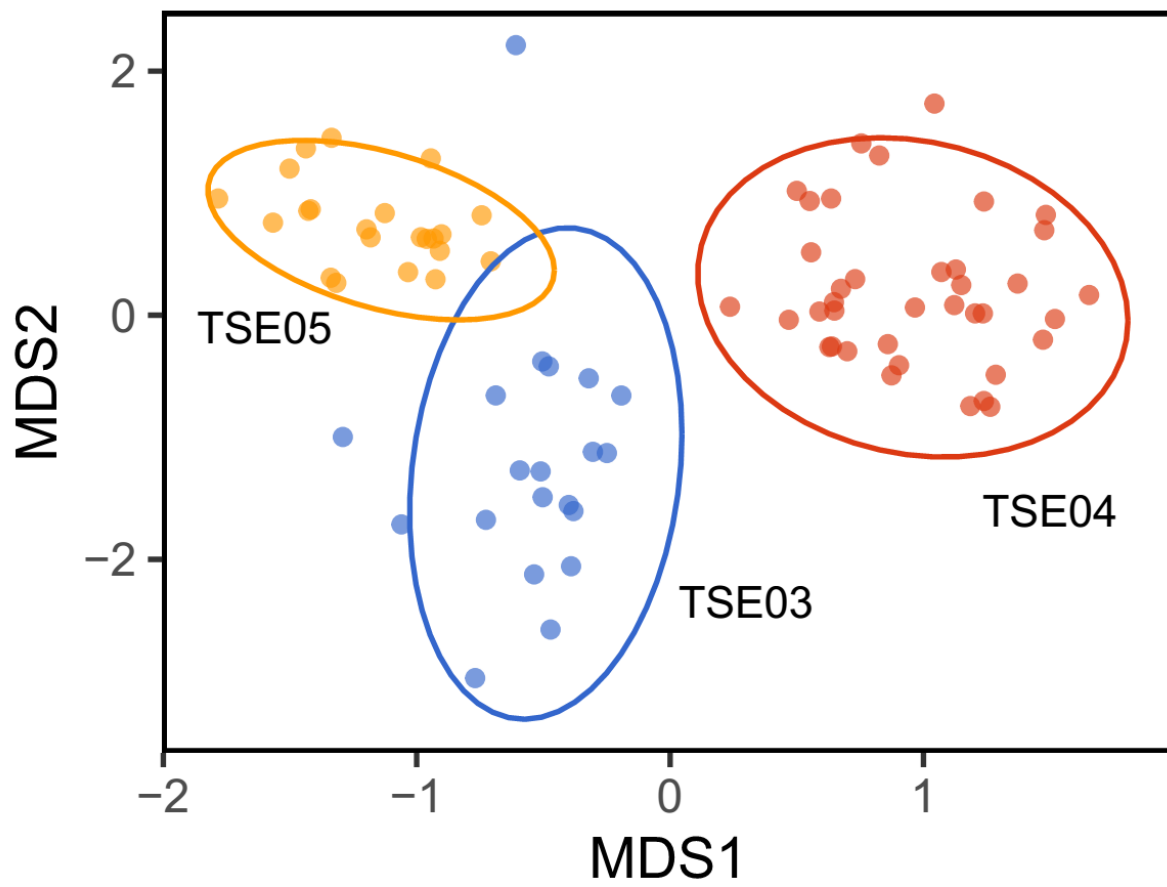

**Fig. 1**

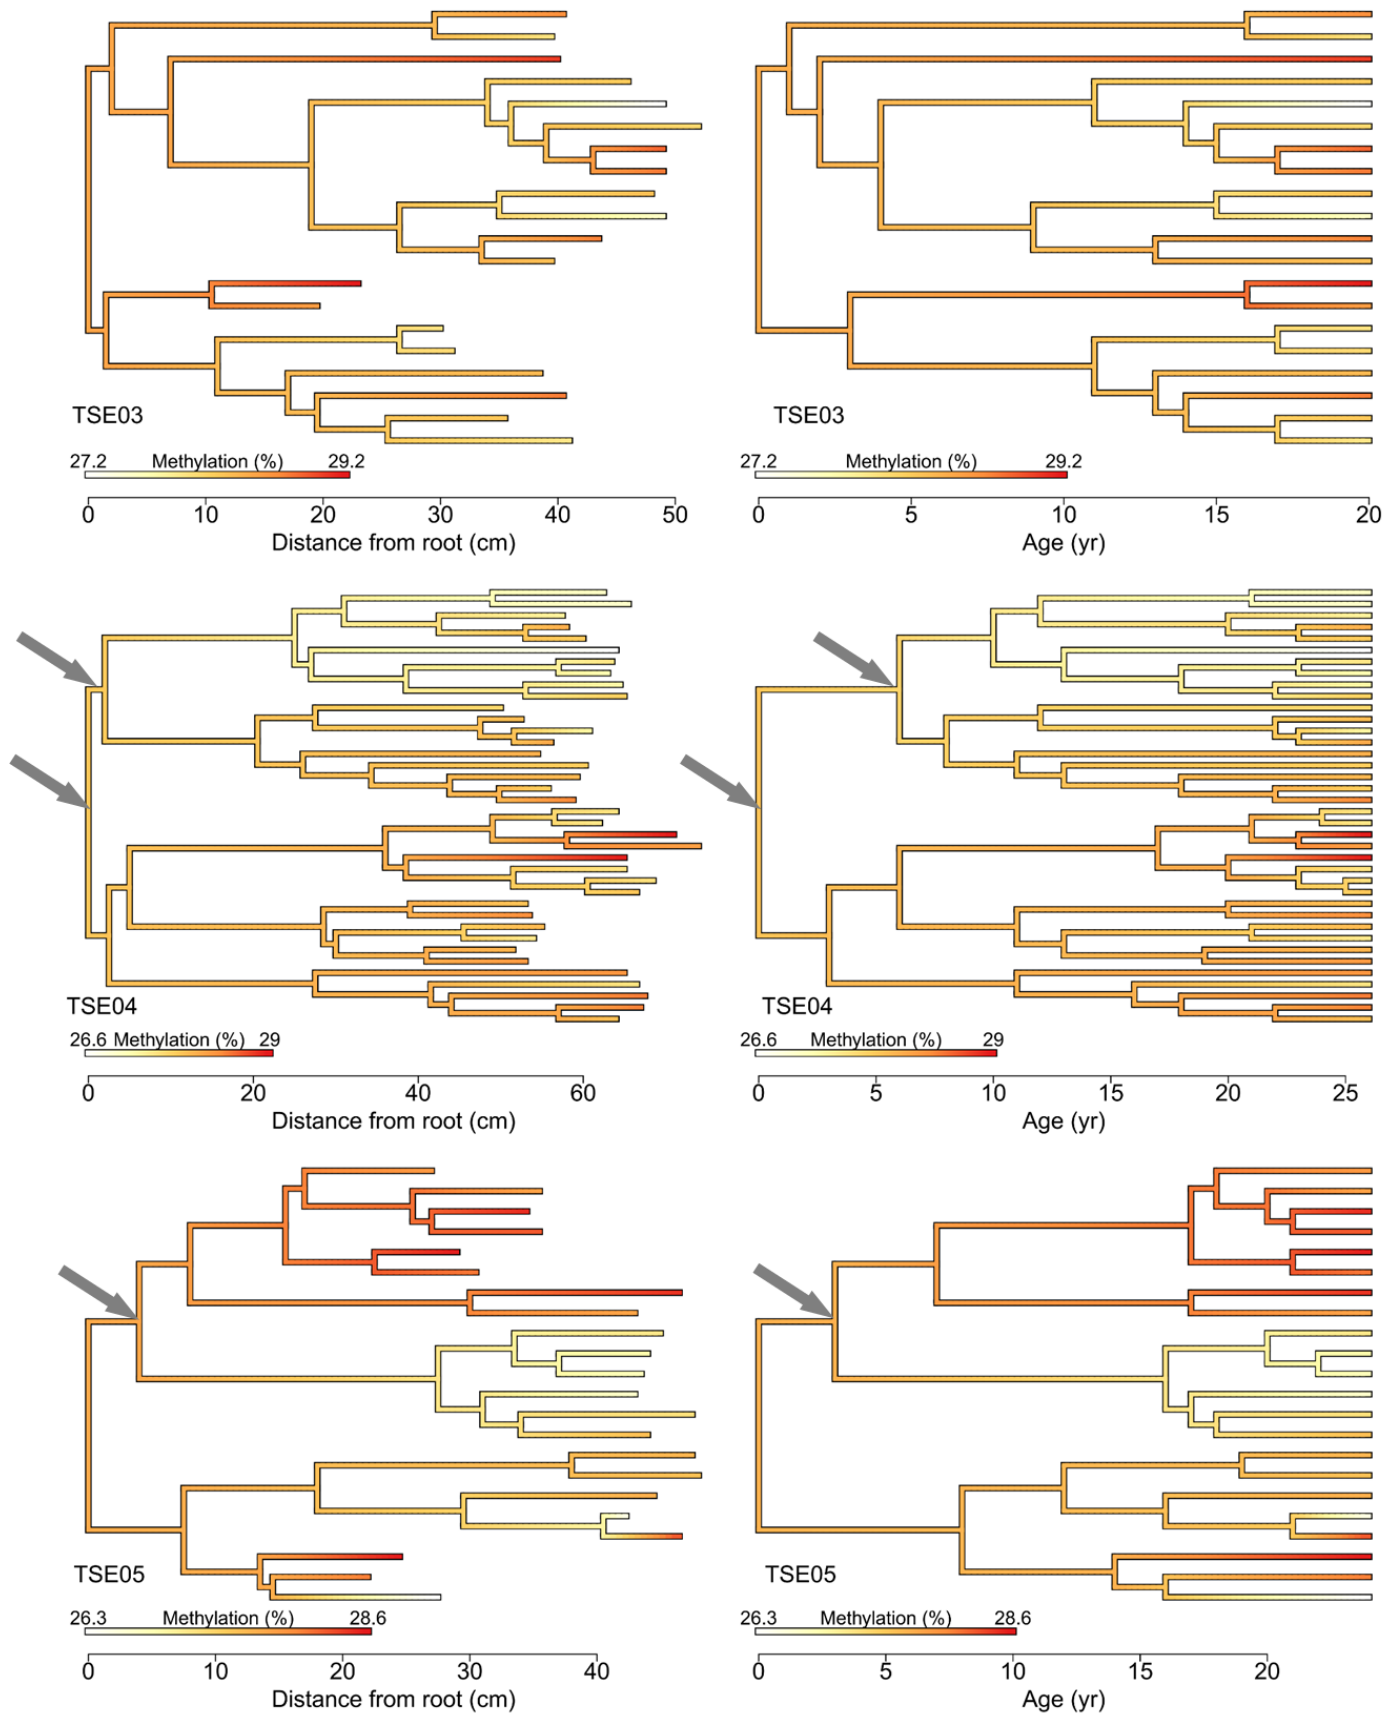

**Fig. 2**

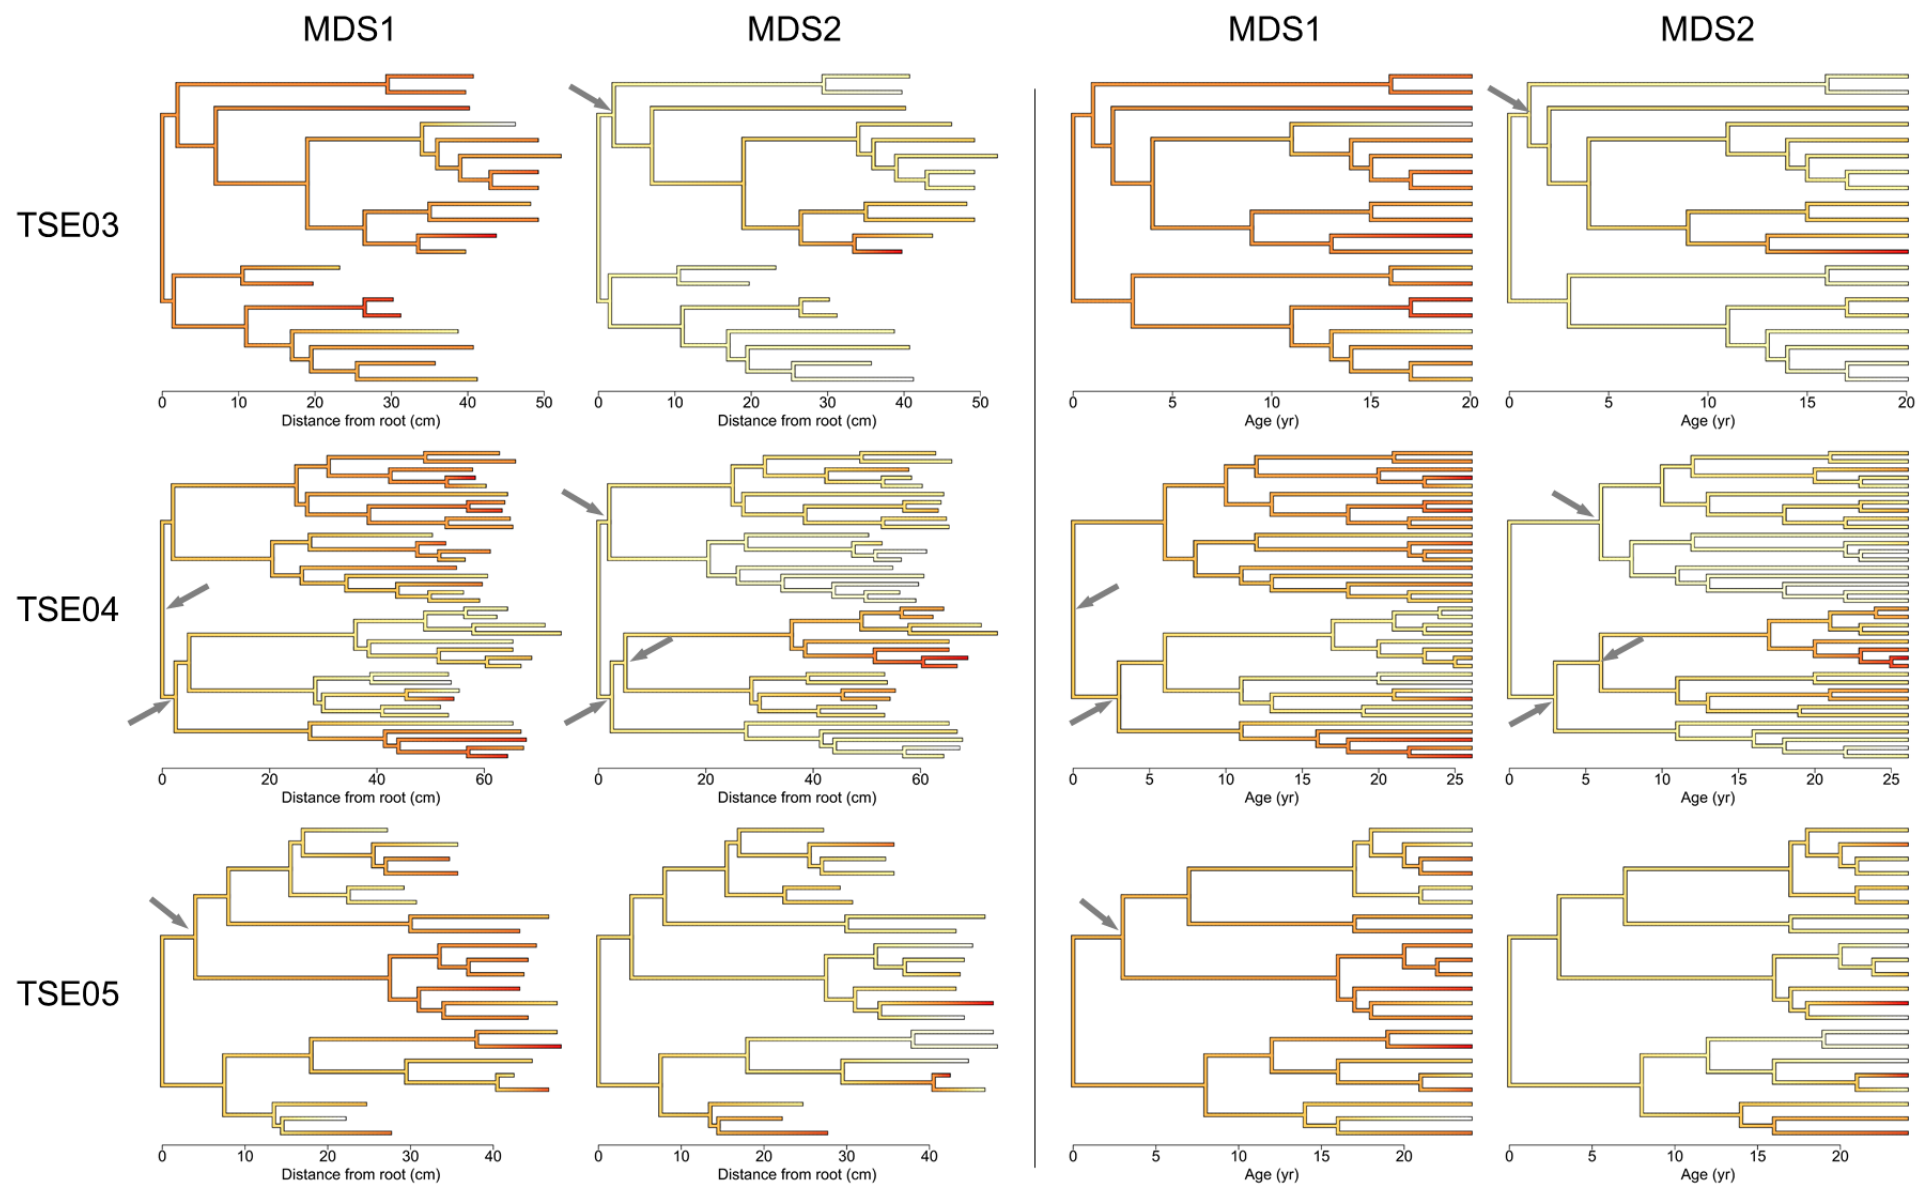

**Fig. 3**



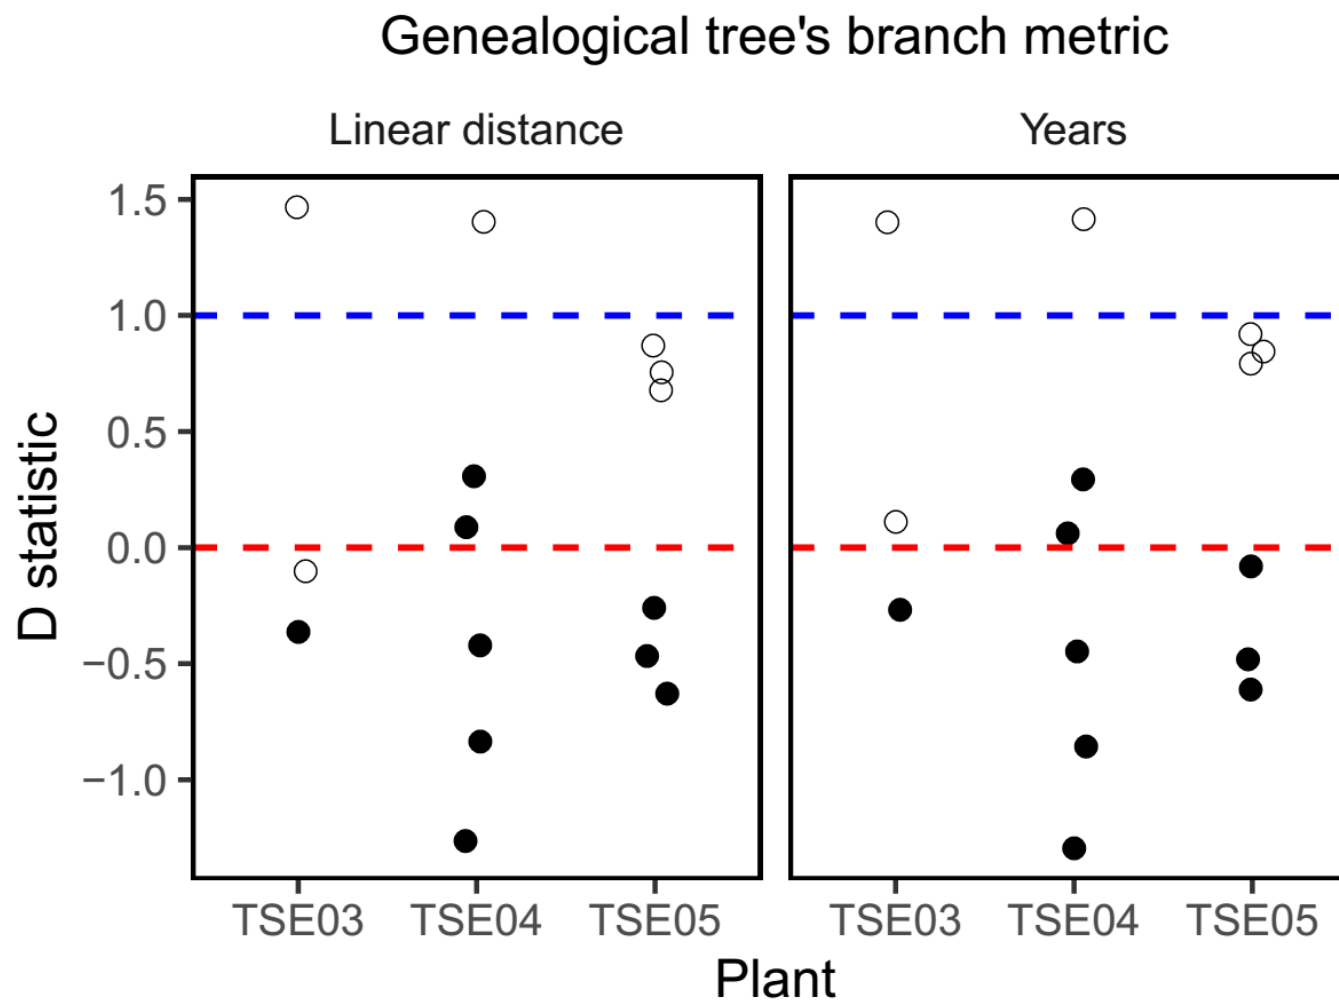

Fig. 4

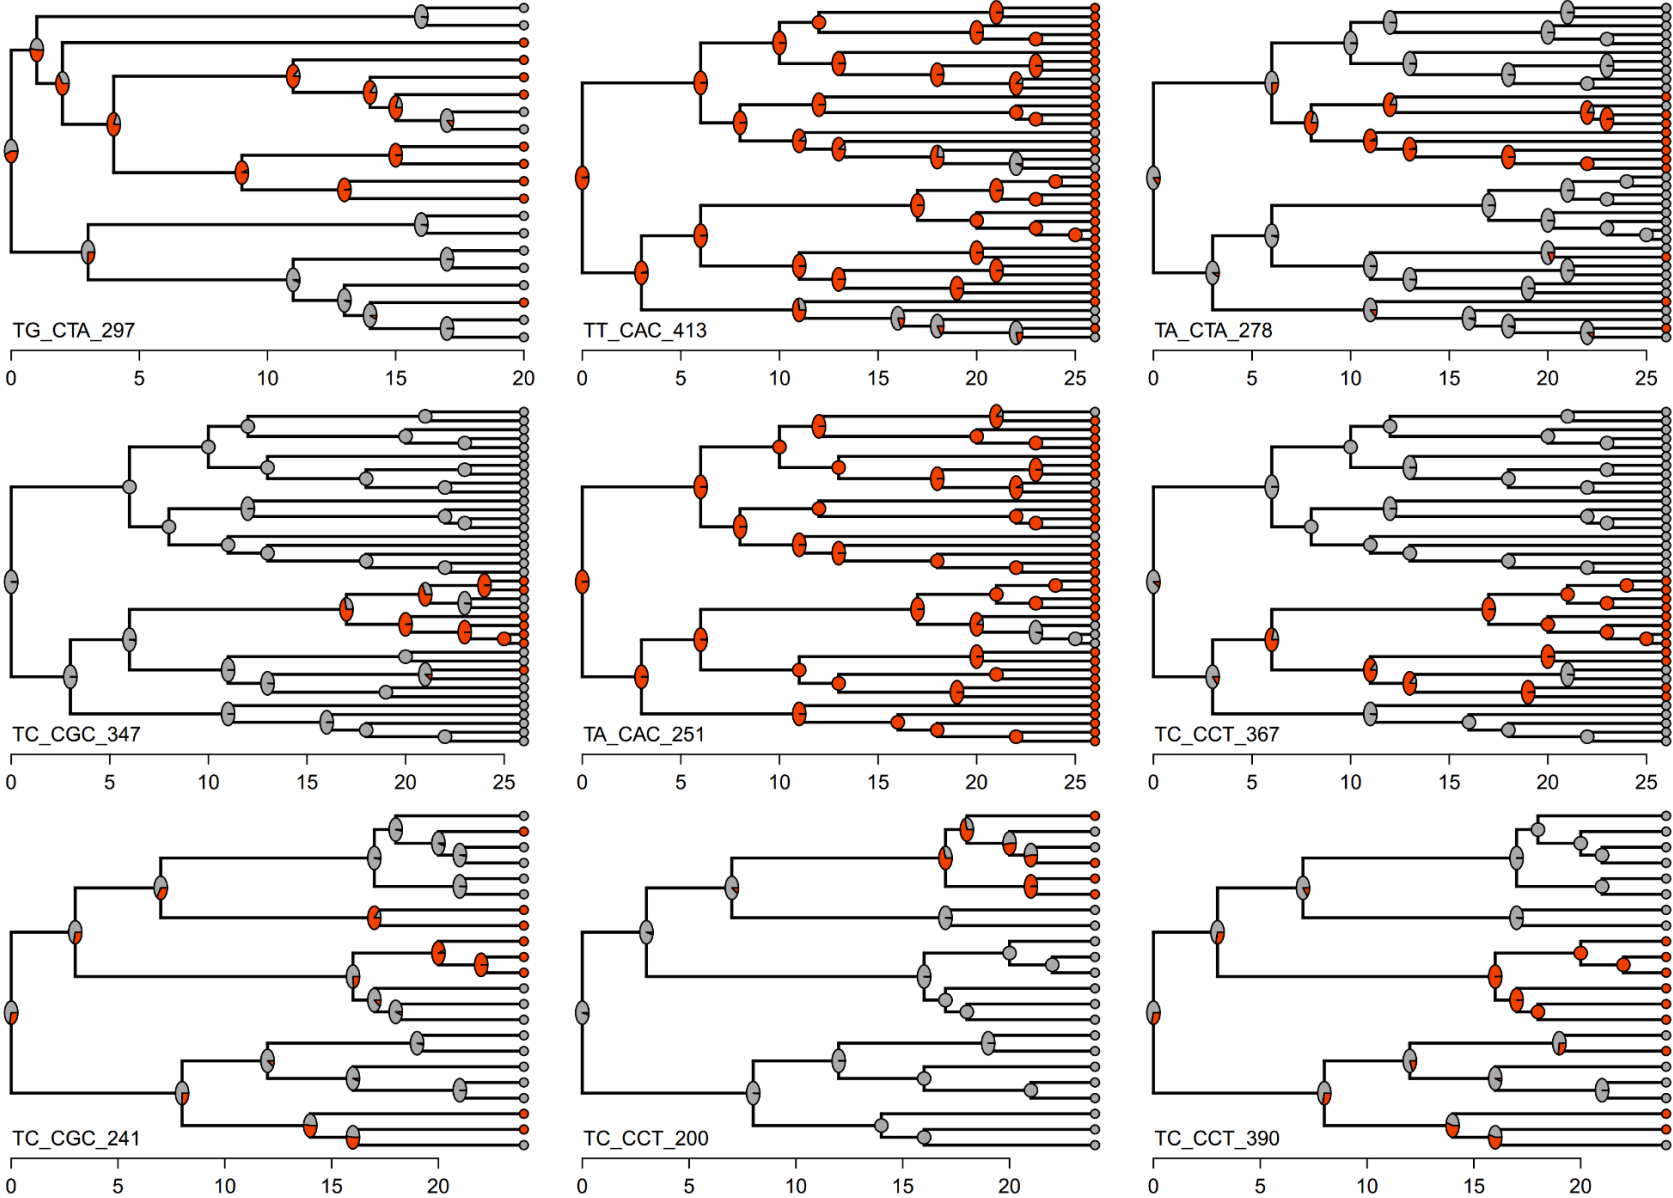

Fig. 5
